# Supplementary material for: Sex-Specific Effects of a Maternal Obesogenic Diet High in Fat and Sugar on Offspring Adiposity, Growth and Behaviour
Source: Preprints.org preprint supplement (doi:10.20944/preprints202310.0796.v1), 2023-10-13
Supplement: Supplementary file 1 [file supplementary]

Archive with 2 entries (2 files):
- Mort Nutrients Supplementary Figure1 with caption.pdf
- Mort Nutrients Supplementary Figure2 with caption.pdf
