# Supplementary material for: Sex-Specific Effects of a Maternal Obesogenic Diet High in Fat and Sugar on Offspring Adiposity, Growth and Behaviour
Source: Preprints.org preprint supplement (doi:10.20944/preprints202310.0796.v1), 2023-10-13
Supplement: Supplementary file 1 [file supplementary › Mort Nutrients Supplementary Figure1 with caption.pdf]

Supplementary Figure 1

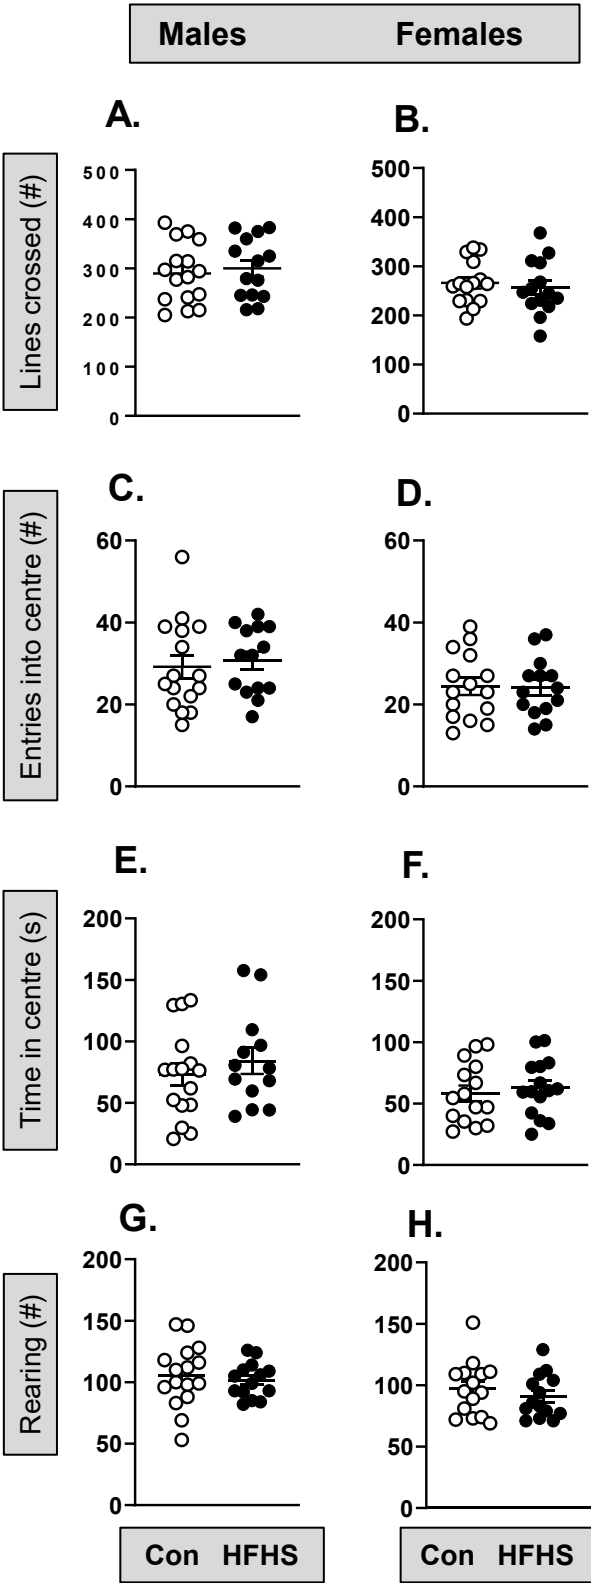

**Supplementary Figure 1. Effect of a maternal obesogenic diet on adult offspring behaviour in the open field.** (A) The number of lines crossed in the open field by male mice on a control (n=16) or high fat, high sugar (HFHS; n=14) diet (p=0.65, t-test); (B) Lines crossed by female mice on a control (n=15) or HFHS (n=14) diet (p=0.61, t-test); (C, D) Entries into the centre of the open field by male (p=0.67, t-test) and female (p=0.93, t-test) mice on a control versus a HFHS diet; (E, F) Time (seconds) spent in the centre of the open field by (p=0.43, t-test) and female (p=0.59, t-test) mice on a control or HFHS diet; (G, H) Number of rears made in the open field by male (p=0.61, t-test) and female (p=0.40, t-test) mice on a control or HFHS diet.
