# Supplementary material for: Sex-Specific Effects of a Maternal Obesogenic Diet High in Fat and Sugar on Offspring Adiposity, Growth and Behaviour
Source: Preprints.org preprint supplement (doi:10.20944/preprints202310.0796.v1), 2023-10-13
Supplement: Supplementary file 1 [file supplementary › Mort Nutrients Supplementary Figure2 with caption.pdf]

Supplementary Figure 2

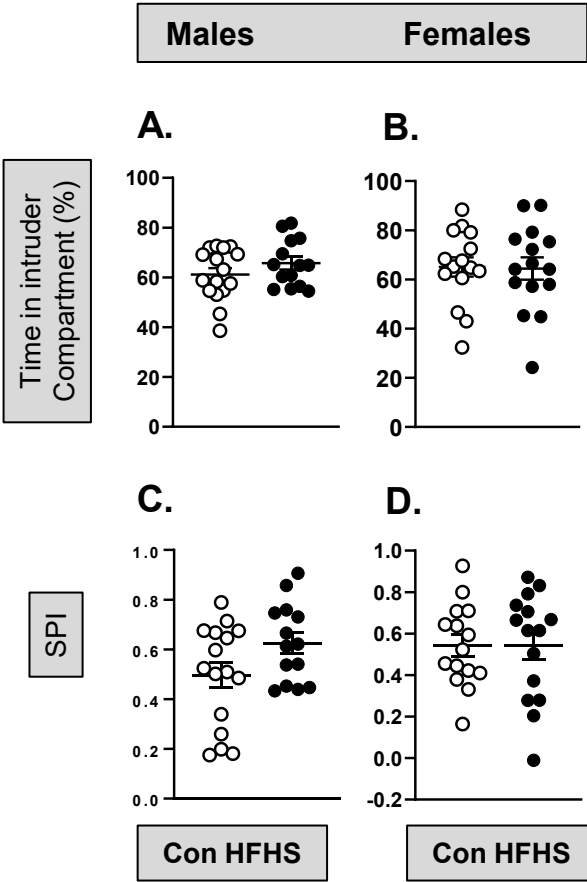

**Supplementary Figure 2.** Effect of a maternal obesogenic diet on adult offspring social interaction behaviour. (A) Percentage time spent in the intruder mouse compartment by male mice from mothers on the control (n=16) or high fat, high sugar (HFHS; n=14) diet (p=0.22, t-test); (B) Percentage time spent in the intruder mouse compartment by female mice from mothers on the control (n=15) or HFHS (n=15) diet (p=0.91, t-test); (C, D) The social preference index, a measure of the time spent interacting with the intruder mouse versus the object, in male mice (p=0.063, t-test) and female mice (p=0.99, t-test) from mothers on the control or HFHS diet.
